# Supplementary material
Source: PubMed Central journal article supplement (PMC7045332)
Supplement: EBM890873_Supplemental_Material1.pdf [file EBM890873_Supplemental_Material1.pdf]

**Table S1. Primer sequence and amplicon length of the genes studied with qPCR.**

| Unigene accession no. | Gene                                                | Left Primer           | Right Primer           | Amplicon length (bp) |
|-----------------------|-----------------------------------------------------|-----------------------|------------------------|----------------------|
| Hs.520640             | <i>Beta-Actin</i> *                                 | TGTGGCATCCACGAACTAC   | TGATCTTGATCTTCATTGTGCT | 175                  |
| Hs.544577             | <i>GADPH</i> *                                      | GGCCTCCAAGGAGTAAGACC  | CTGTGAGGAGGGGAGATTCA   | 130                  |
| M11717.1              | <i>HSP70</i><br><i>promoter</i><br><i>region</i> ** | CGCCATGGAGACCAACACCC  | GCGGTTCCCTGCTCTCTGTC   | 488                  |
| Hs.20685              | FXN                                                 | TAGCAGAGGAAACGCTGGAC  | GATTTGCTTGTTTGGCGTCT   | 170                  |
| Hs.8821               | HAMP                                                | GACCAGTGGCTCTGTTTTCC  | CACATCCCACACTTTGATCG   | 180                  |
| Hs.443914             | SOD-1                                               | GGTGTGGCCGATGTGTCTAT  | CACCTTTGCCCAAGTCATCT   | 112                  |
| Hs.487046             | SOD-2                                               | GGAAGCCATCAAACGTGACT  | CTGATTTGGACAAGCAGCAA   | 148                  |
| Hs.502302             | CAT                                                 | GTGCAAATGCAAGCTAGTGG  | TCCAATCATCCGTCAAACA    | 150                  |
| Hs.76686              | GPX-1                                               | CTCTTCGAGAAGTGCGAGGT  | AGGCTCGATGTCAATGGTCT   | 240                  |
| Hs.271510             | GSR                                                 | CCCATGTATCACGCAGTTA   | AAACCCTGCAGCATTTATC    | 129                  |
| Hs.301961             | GST                                                 | TCATTACCCTTCCTGCACT   | ACCAGTCAATGCTGCTCCTT   | 146                  |
| Hs.654458             | IL-6                                                | CAATGAGGAGACTTGCCTGGT | AGCTGCGCAGAATGAGATGA   | 275                  |
| Hs.241570             | TNF- $\alpha$                                       | CCCCAGGGACCTCTCTCTAA  | TCTCAGCTCCACGCCATT     | 172                  |
| Hs.514284             | NRF-2                                               | GAGAGCCCAGTCTTCATTGC  | GTTTGGCTTCTGGACTTGA    | 205                  |
| Hs.654922             | TNFRD1                                              | ATGGACGATCCGTCAAGAG   | GGATTCCAATTGTGCTGTCC   | 185                  |

\*Beta-Actin and GADPH were the housekeeping genes used for normalization purposes.

\*\*The promoter of HSP70 was amplified to check for the presence of genomic DNA in the RNA preparation before carrying out the reverse transcription.
