# Supplementary material
Source: PubMed Central journal article supplement (PMC7045332)
Supplement: EBM890873_Supplemental_Material2.pdf [file EBM890873_Supplemental_Material2.pdf]

**Table S2. Lipidomic analysis of four FRDA patiens**

| FATTY ACIDS | PATIENT 1 |       | PATIENT 2 |       | PATIENT 3 |       | PATIENT 4 |       | Controls (mean± std dev) | ANOVA  | FDR≤0.05 |
|-------------|-----------|-------|-----------|-------|-----------|-------|-----------|-------|--------------------------|--------|----------|
|             | pre       | post  | pre       | post  | pre       | post  | pre       | post  |                          |        |          |
| Palmitic    | 24.8      | 27.9  | 27.2      | 28.7  | 24.5      | 26.2  | 24.9      | 27.6  | 24.7 ± 0.7               | 0.0013 | YES      |
| Palmitoleic | 0.4       | 0.3   | 0.4       | 0.5   | 0.4       | 0.3   | 0.3       | 0.2   | 0.3 ± 0.1                | 0.0824 | NO       |
| Stearic     | 18.7      | 16.7  | 17.8      | 15.0  | 17.3      | 17.1  | 18.2      | 17.2  | 15.7 ± 1.6               | 0.0454 | NO       |
| Oleic       | 17.3      | 17.5  | 15.9      | 15.7  | 16.7      | 18.0  | 16.7      | 17.5  | 18.2 ± 1.3               | 0.0861 | NO       |
| Vaccenic    | 1.3       | 1.3   | 1.5       | 1.5   | 1.1       | 1.2   | 1.3       | 1.3   | 1.3 ± 0.1                | 0.8877 | NO       |
| Linoleic    | 12,0      | 13,8  | 11,9      | 12,5  | 12,8      | 12,7  | 12,1      | 12    | 13.9 ± 1.6               | 0.1002 | NO       |
| DGLA        | 2.4       | 2.0   | 3.1       | 3.4   | 1.7       | 1.7   | 1.8       | 2.0   | 2.3 ± 0.4                | 0.9898 | NO       |
| Arachidonic | 17.8      | 14.9  | 16.9      | 16.4  | 18.6      | 16.8  | 20.3      | 17.8  | 15.9 ± 0.9               | 0.0086 | YES      |
| EPA         | 0.4       | 0.7   | 0.4       | 0.4   | 0.5       | 0.5   | 0.6       | 0.5   | 0.7 ± 0.1                | 0.0517 | NO       |
| DHA         | 4.7       | 5.0   | 4.8       | 5.8   | 6.1       | 5.3   | 3.6       | 3.7   | 6.3 ± 0.9                | 0.0325 | NO       |
| Tot. SFA    | 43.5      | 44.6  | 45.0      | 43.7  | 41.8      | 43.3  | 43.1      | 44.8  | 40.4 ± 1.3               | 0.0005 | YES      |
| Tot. MUFA   | 19.0      | 19.1  | 17.8      | 17.7  | 18.2      | 19.5  | 18.3      | 19.0  | 19.8 ± 1.3               | 0.1021 | NO       |
| Tot. PUFA   | 37.3      | 36.4  | 37.1      | 38.5  | 39.7      | 37.0  | 38.4      | 36.0  | 39.1 ± 0.8               | 0.0157 | YES      |
| Trans 18:1  | 0.1       | 0.0   | 0.1       | 0.1   | 0.1       | 0.1   | 0.1       | 0.1   | 0.1 ± 0                  | 0.6354 | NO       |
| Trans AA    | 0.1       | 0.0   | 0.1       | 0.1   | 0.1       | 0.1   | 0.1       | 0.2   | 0.1 ± 0                  | 1      | NO       |
| Tot. Trans  | 0.2       | 0.0   | 0.2       | 0.2   | 0.2       | 0.2   | 0.2       | 0.3   | 0.2 ± 0.0                | 0.8514 | NO       |
| SFA/MUFA    | 2.3       | 2.3   | 2.5       | 2.5   | 2.3       | 2.2   | 2.4       | 2.4   | 2.1 ± 0.2                | 0.0056 | YES      |
| n-6/n-3     | 6.3       | 5.4   | 6.1       | 5.2   | 5.0       | 5.4   | 8.1       | 7.6   | 4.7 ± 0.7                | 0.006  | YES      |
| tot omega-3 | 5.1       | 5.7   | 5.2       | 6.2   | 6.6       | 5.8   | 4.2       | 4.2   | 7.0 ± 1                  | 0.0228 | NO       |
| tot omega-6 | 32.2      | 30.7  | 31.9      | 32.3  | 33.1      | 31.2  | 34.2      | 31.8  | 32.1 ± 1                 | 0.1723 | NO       |
| S.I.        | 1.1       | 1.0   | 1.1       | 1.0   | 1.0       | 1.0   | 1.1       | 1.0   | 0.9 ± 0.1                | 0.0071 | YES      |
| U.I.        | 151.6     | 145.8 | 149.3     | 155.3 | 162.4     | 151.5 | 153.7     | 144.9 | 140 ± 5.5                | 0.003  | YES      |
| P.I.        | 135.2     | 128.4 | 134.1     | 141.5 | 148.7     | 135.3 | 135.7     | 126.6 | 133.1 ± 12.6             | 0.6696 | NO       |

*Pre* and *post* are referred to the 2-month treatment with tocotrienol. The content of individual fatty acids in erythrocyte membranes is expressed as percentages of the total fatty acids identified.

**S.I. [Saturation Index] was calculated according to the formula: (18:0/18:1).**

**U.I. [Unsaturation Index] was calculated according to the formula: (% Monoenoic x 1) + (% Dienoic x 2) + (% Trienoic x 3) + (% Tetraenoic x 4) + (% Pentaenoic x 5) + (% Hexaenoic x 6).**

**P.I. [Peroxidation Index] was calculated according to the formula: (% Monoenoic x 0.025) + (% Dienoic x 1) + (% Trienoic x 2) + (% Tetraenoic x 4) + (% Pentaenoic x 6) + (% Hexaenoic x 8).**
